# Supplementary material
Source: PubMed Central journal article supplement (PMC2845274)
Supplement: emboj20102s17.pdf [file emboj20102s17.pdf]

Manuscript EMBO-2009-71060

## **Force Generated by Actomyosin Contraction Builds Bridges Between Adhesive Contacts**

Olivier M. Rossier, Nils Gauthier, Nicolas Biais, Wynn Vonnegut, Marc-Antoine Fardin, Philip Avigan, Evan R. Heller, Anurag Mathur, Saba Ghassemi, Michael S. Koeckert, James C. Hone

*Corresponding author: Michael P. Sheetz, Columbia University*

---

### **Review timeline:**

Submission date:  
Accepted:

08 April 2009  
05 January 2010

---

### **Transaction Report:**

No Review Process File is available with this article, as the authors have chosen not to make the review process public in this case.
